# Supplementary material for: Fullerene bridged metallocyclodextrin donor–acceptor complexes: optical spectroscopy and photophysics
Source: Royal Society of Chemistry journal article supplement (doi:10.1039/b512830g), 2005-12-15

Supplementary Material:

S1. Proton NMR of (a)  $[\text{Ru}(\text{bpy})_2(\text{CD-2Py})]^{2+}$  and (b)  $[\text{Ru}(\text{d}_8\text{-bpy})_2(\text{CD-2Py})]^{2+}$  in  $\text{d}_4\text{-DMSO}$  at room temperature

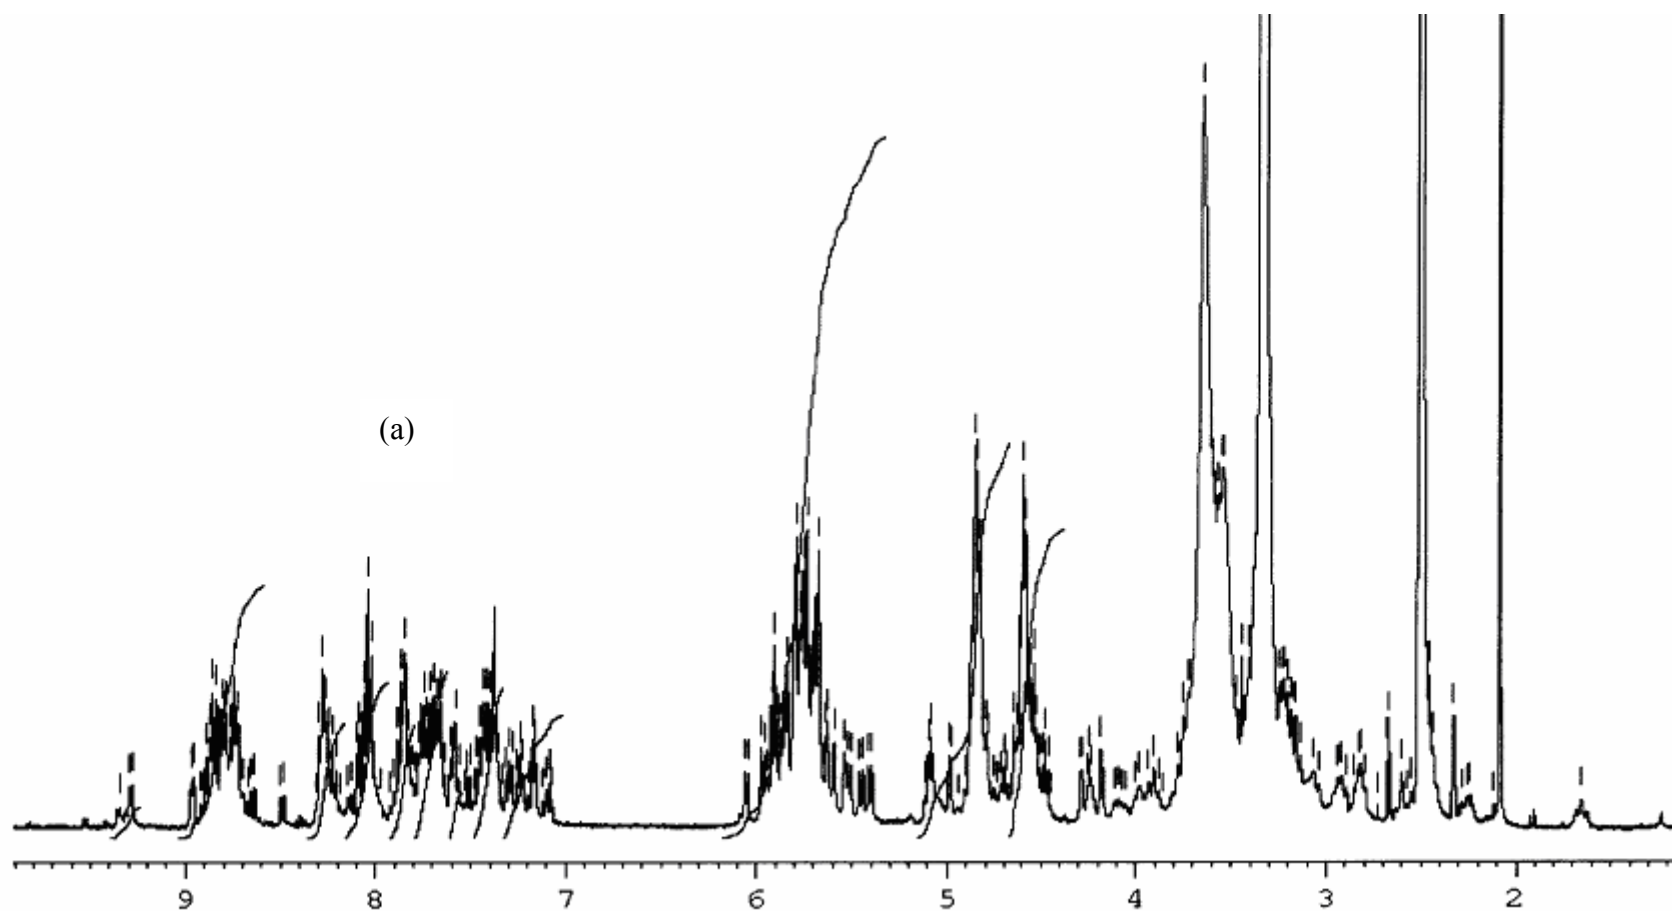

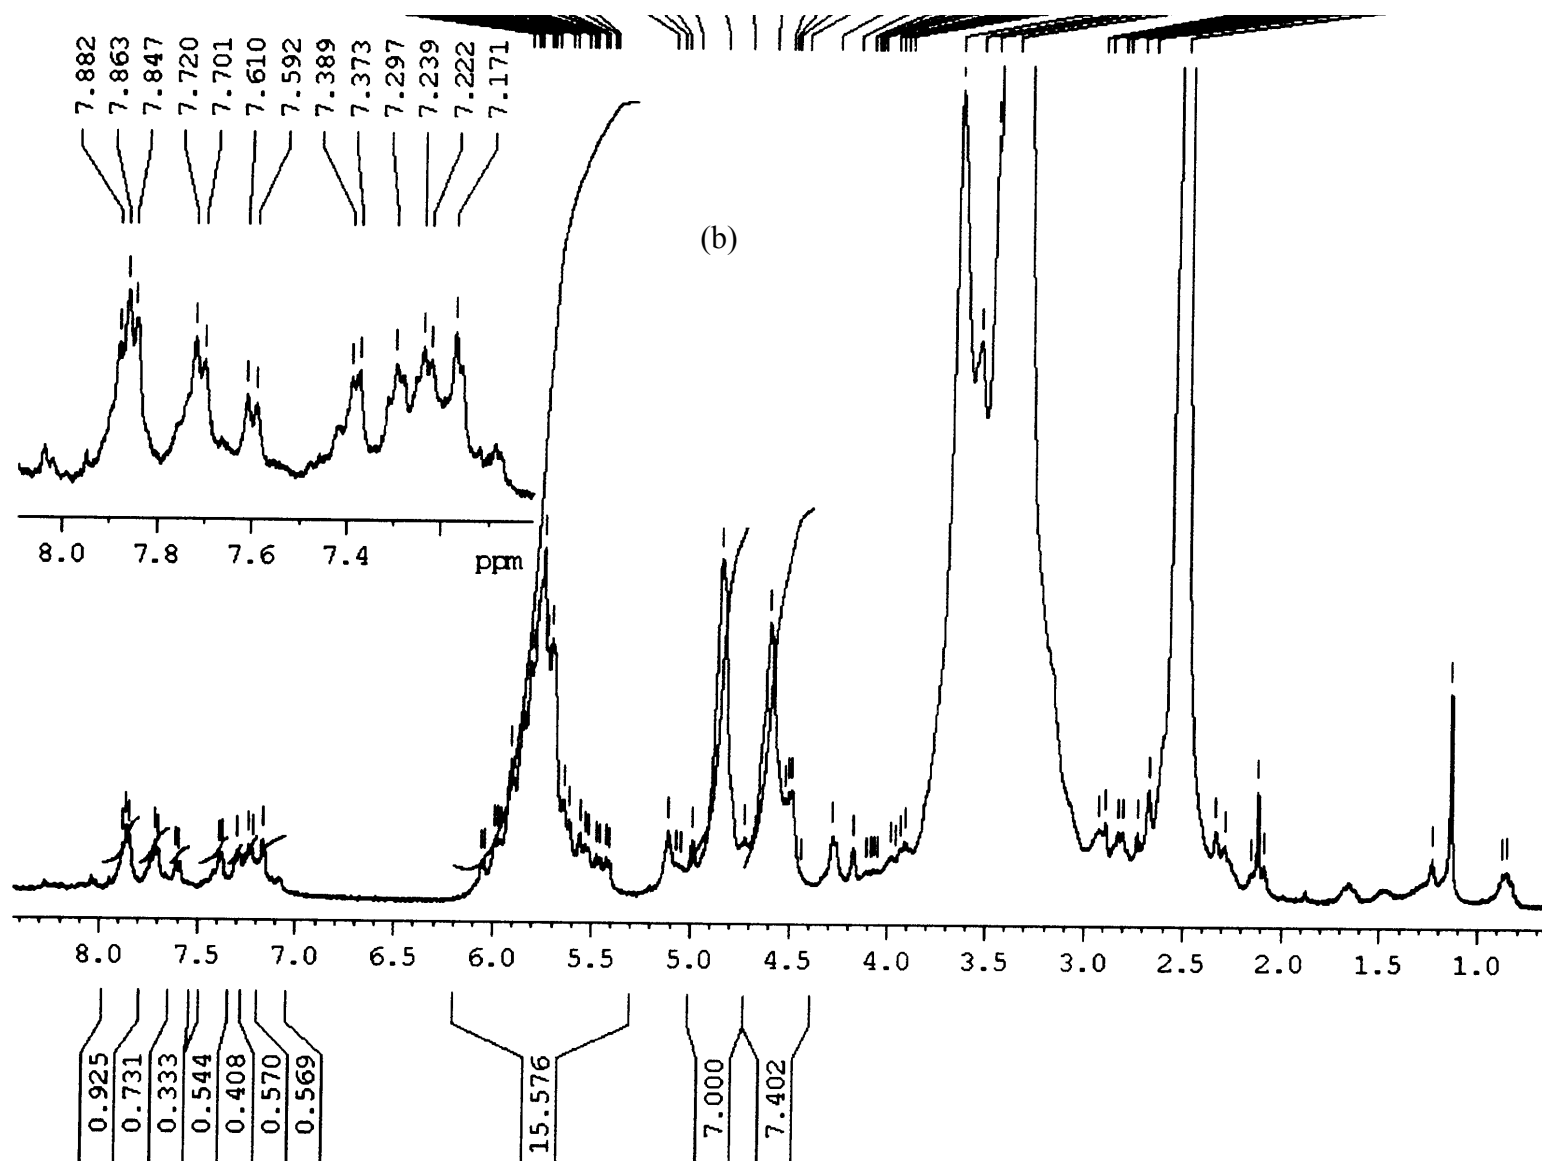

Figure S2: Electronic Spectra of the free cyclodextrin ligand  $\beta$ -CD-4-Py and the  $C_{60}$  inclusion  $(CD-4-Py)_2C_{60}$  complex in  $H_2O$

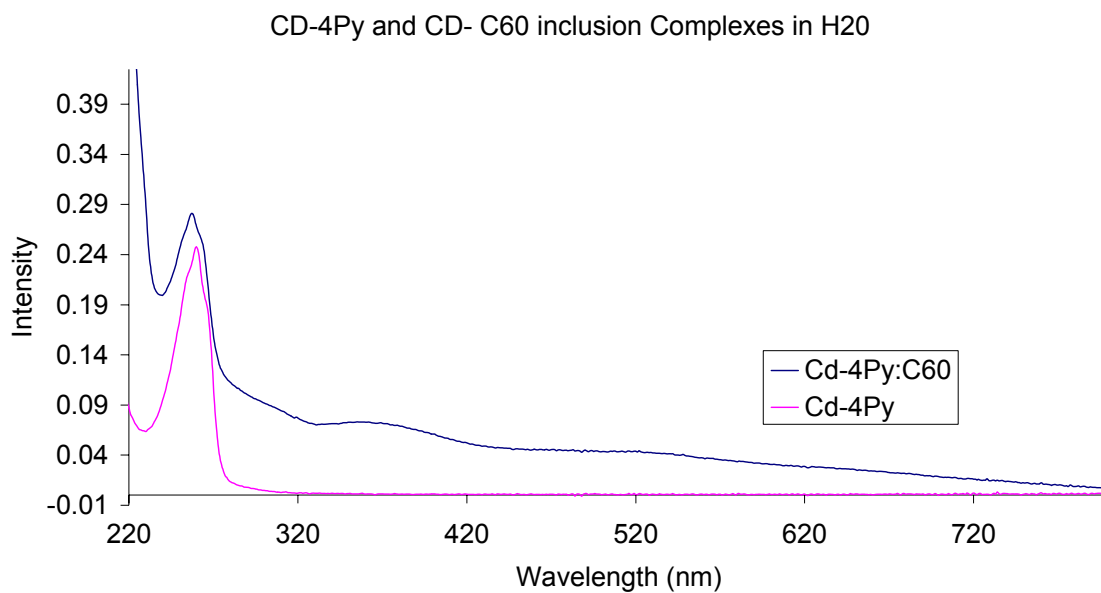

S3 Electrochemistry of (a)  $[\text{Re}(\text{bpy})(\text{CO})_3(\text{CD-4Py})]^+$  and  $[\text{Ru}(\text{bpy})_2(\text{CD-2Py})]^{2+}$  in DMF/0.1 M  $\text{TeaBF}_4$ .

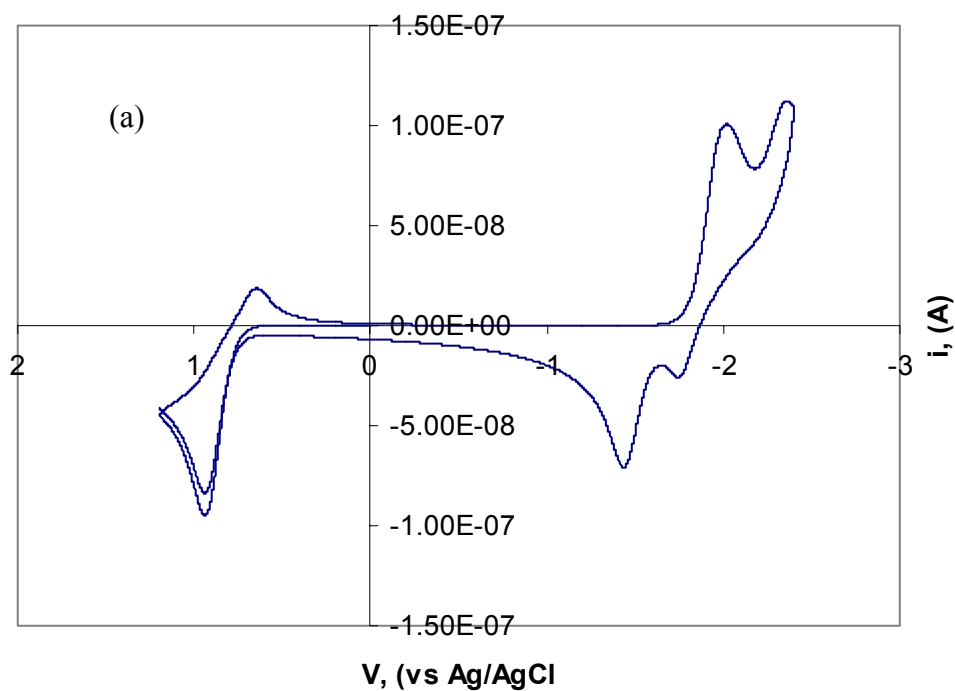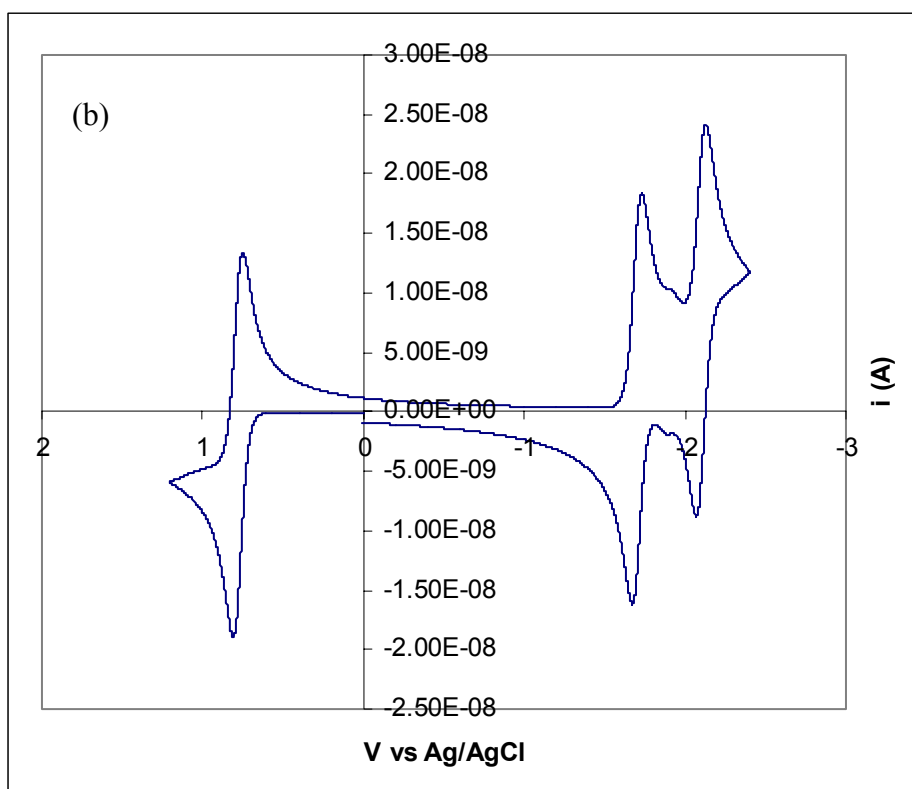

Supplement: b512830g.pdf [file b512830g.pdf]
